# Supplementary material
Source: PubMed Central journal article supplement (PMC3638026)

## Supplemental data

### Critical role of STAT3 in leptin's metabolic actions

Christoph Buettner, Alessandro Pocai, Evan D. Muse, Anne M. Etgen, Martin G. Myers, Jr., and Luciano Rossetti

**Table S1.** General characteristics

| <b>Treatment</b>                       | <b>Vehicle</b> | <b>Leptin</b> | <b>Leptin plus<br/>STAT3 PI</b> |
|----------------------------------------|----------------|---------------|---------------------------------|
| N:                                     | 7              | 6             | 7                               |
| <b>Basal:</b>                          |                |               |                                 |
| <b>Daily Food Intake</b><br>(kcal/rat) | 135.9 ± 3      | 131.2 ± 4     | 136.3 ± 4                       |
| <b>Body Weight</b> (g)                 | 295 ± 7        | 299 ± 4       | 315 ± 3                         |
| <b>Glucose</b> (mmol/l)                | 7.8 ± 0.7      | 7.4 ± 0.2     | 8.0 ± 0.3                       |
| <b>Insulin</b> (ng/ml)                 | 2.7 ± 0.2      | 2.6 ± 0.3     | 2.1 ± 0.1                       |
| <b>FFA</b> (mM)                        | 0.8 ± 0.0      | 1.1 ± 0.1     | 0.9 ± 0.2                       |
| <b>Clamp:</b>                          |                |               |                                 |
| <b>Glucose</b> (mM)                    | 7.6±0.3        | 7.8±0.2       | 7.2±0.4                         |
| <b>Insulin</b> (ng/ml)                 | 1.±0.28        | 1.6±0.18      | 1.3±0.15                        |
| <b>Leptin</b> (ng/ml)                  | 1.3±0.2        | 1.3±0.1       | 1.5±0.2                         |
| <b>FFA</b> (mM)                        | 0.8±0.1        | 0.7±0.1       | 1.0±0.2                         |

Effect of central leptin and STAT3 inhibition on the circulating fasting levels of glucose, insulin, free fatty acids in rats that were fed a high fat diet for 3 days at basal levels and during clamp studies.. Biochemical parameters represent the average ± S.E. of at least five basal measurements in each rat. Food intake represents the average ± S.E. of the last three days preceding the study.

**Table S2.** Effect of central leptin and STAT3 inhibition on the “direct” and “indirect” pathway of hepatic UDP glucose formation

| <b>Group</b>            | <b>[3H]Glc</b> | <b>[3H]UDPGlc</b> | <b>% Direct</b> | <b>[14C]PEP</b> | <b>[14C]UDPGlc</b> | <b>% Indirect</b> |
|-------------------------|----------------|-------------------|-----------------|-----------------|--------------------|-------------------|
|                         | dpm/nmol       | dpm/nmol          |                 | dpm/nmol        | dpm/nmol           |                   |
| <b>Vehicle</b>          | 49.5 ± 3.9     | 8.8 ± 1.6         | 18.2±3.9        | 8.9 ± 2.0       | 4.4 ± 0.7          | 28.3 ±4.6         |
| <b>Leptin</b>           | 30.7±2.2*      | 4.1 ± 0.3*        | 14.9±1.9        | 5.4 ± 0.5       | 2.3 ± 0.2*         | 24.0±2.8          |
| <b>Leptin + STAT3PI</b> | 58.1 ± 2.9     | 8.5 ± 0.5         | 15.3±2.0        | 7.9 ± 1.1       | 1.9±0.4            | 24.1±3.6          |

Specific activities of plasma glucose, hepatic UDP-glucose (UDP-Glc) and phosphoenolpyruvate (PEP) were used to calculate the contribution of plasma glucose and PEP-gluconeogenesis to the hepatic UDP-glucose pool following [<sup>3</sup>H-3]-glucose and [U-<sup>14</sup>C]-lactate infusions in rats at the completion of pancreatic/insulin clamp studies. Data are means ± SE. \*p < 0.05 vs. vehicle or controls.

**Table S3.** Metabolic characteristics of *s/s* and *db/db* mice under fasting and clamped conditions

|                             | <i>s/s</i>  | <i>db/db</i> | <b>ttest</b> |
|-----------------------------|-------------|--------------|--------------|
| N:                          | 7           | 6            |              |
| <b>Food Intake</b> (kcal/d) | 11.4 ± 0.2  | 11.4 ± 0.2   |              |
| <b>Body Weight</b> (g)      | 27.9 ± 0.94 | 26.6 ± 0.4   | 0.148        |
| <b>Glucose</b> (mmol/l)     | 8.3 ± 0.4   | 15.8 ± 1.6   | <0.001       |
| <b>Insulin</b> (ng/ml)      | 1.6±0.25    | 3.7±0.7      | <0.001       |
| <b>Leptin</b> (ng/ml)       | 66±15       | 260±23       | <0.001       |
| <b>Glucagon</b> (pg/ml)     | 216±23      | 319±60       | 0.04         |
| <b>FFA</b> (mM)             | 0.94 ± 0.2  | 1.0 ± 0.1    | 0.34         |

Biochemical parameters represent the average ± S.E. \*p < 0.01 vs. vehicle or regular chow.

**Figure S1.** Effect of leptin on glucose metabolism in rats with MBH expression of STAT3 dominant negative

**A)** Time line for the implantation of catheters and the MBH infusion of the adenovirus expressing a dominant negative mutant of STAT3 (STAT3 DN) in rats. All rats received a lard-enriched (high fat) diet for three days to induce hepatic insulin resistance.

**B)** Western blots of MBH extracts confirms the over-expression of the STAT3 DN leading to impaired leptin-induced STAT3 Y705 phosphorylation one week after MBH adenoviral injection. For leptin signaling studies 2.5 ug of leptin was injected ICV and the animals were sacrificed 30 min. later.

**C)** Central administration of leptin markedly increases the rate of glucose infusion in rats receiving LacZ but not STAT3DN adenovirus.

**D)** This effect was entirely accounted for by increased rate of glucose production in the STAT3DN compared with the LacZ group. \*p <0.05 vs. LacZ infused group.

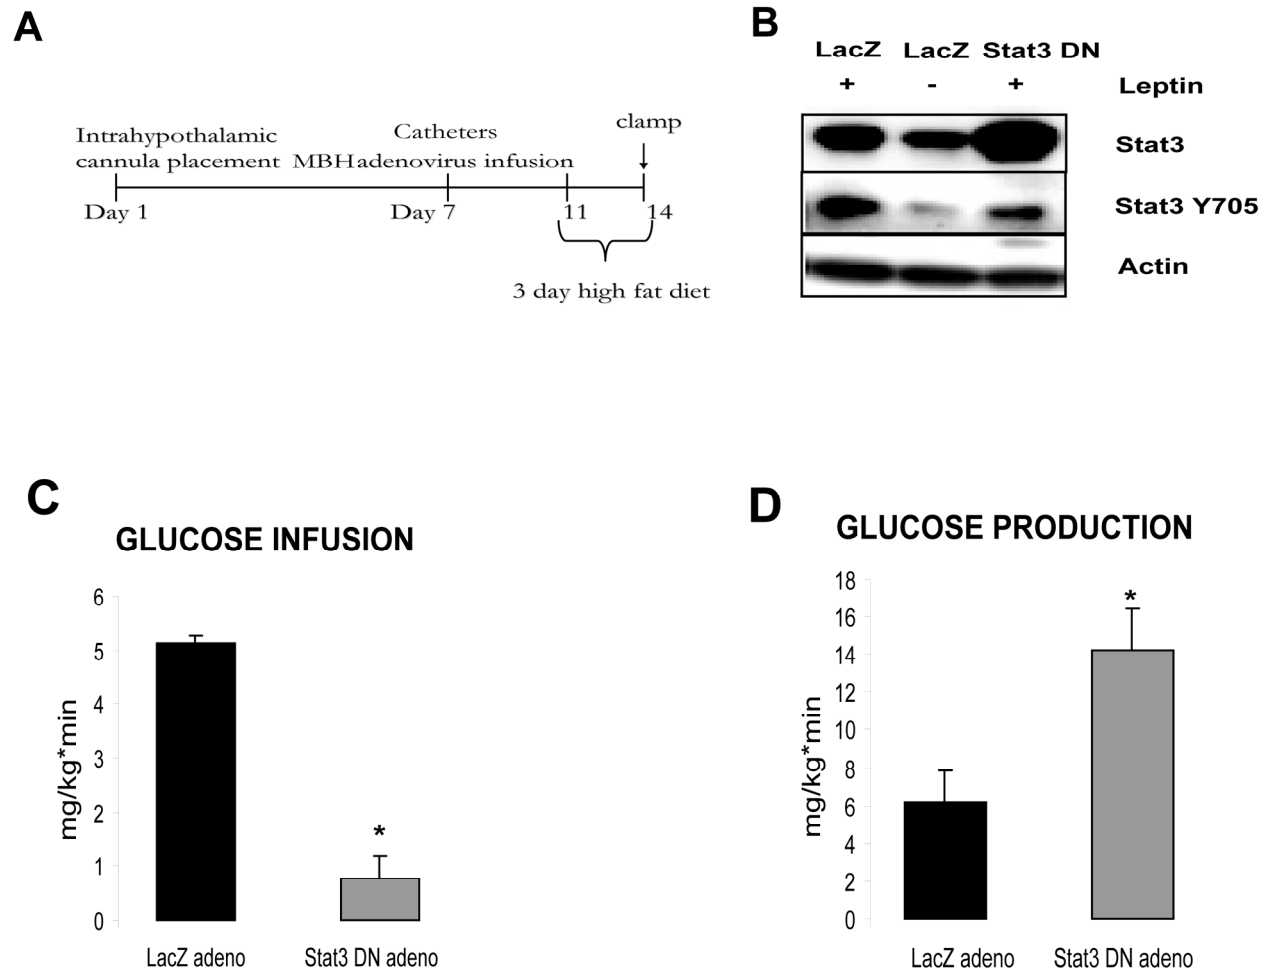

Supplement: NIHMS439839-supplement-1.pdf [file NIHMS439839-supplement-1.pdf]
